# Supplementary material for: Retinitis Pigmentosa withEYSMutations Is the Most Prevalent Inherited Retinal Dystrophy in Japanese Populations
Source: Hindawi journal article supplement (doi:10.1155/2015/819760), 2015-01-01
Supplement: f1 [file 819760.f1.pdf]

**Supplemental Table S2. Patients with compound heterozygous *EYS* mutations**

| patient | location | DNA variant                                       | Protein variant   | SNP ID     | MAF    |
|---------|----------|---------------------------------------------------|-------------------|------------|--------|
| 1       | ex32     | c. 6563T>C                                        | p. I2188T         |            | 0      |
|         | ex44     | c. 8868C>A                                        | p. Y2956*         |            | 0      |
| 2       | ex26     | c. 4957_4958insA                                  | p. S1653Kfs*2     |            | 0      |
|         | ex32     | c. 6557G>A                                        | p. G2186E         | rs74419361 | 0.0023 |
| 3       | ex26     | c. 4957_4958insA                                  | p. S1653Kfs*2     |            | 0      |
|         | ex32     | c. 6563T>C                                        | p. I2188T         |            | 0      |
| 4       | ex32     | c. 6557G>A                                        | p. G2186E         | rs74419361 | 0.0023 |
|         | ex16     | c. 2522_2523insA                                  | p. Y841fs*        |            | 0      |
| 5       | ex15     | c. 2380C>T                                        | p. R794*          |            | 0      |
|         | ex26     | c. 4957_4958insA                                  | p. S1653Kfs*2     |            | 0      |
| 6       | ex26     | c. 4957_4958insA                                  | p. S1653Kfs*2     |            | 0      |
|         | ex44     | c. 8868C>A                                        | p. Y2956*         |            | 0      |
| 7       | ex26     | c. 4957_4958insA                                  | p. S1653Kfs*2     |            | 0      |
|         | IVS38    | c. -1G>T                                          | p. -              |            | 0      |
| 8       | ex26     | c. 4957_4958insA                                  | p. S1653Kfs*2     |            | 0      |
|         | ex44     | c. 8868C>A                                        | p. Y2956*         |            | 0      |
| 9       | ex26     | c. 4957_4958insA                                  | p. S1653Kfs*2     |            | 0      |
|         | ex44     | c. 8868C>A                                        | p. Y2956*         |            | 0      |
| 10      | ex32     | c. 6557G>A                                        | p. G2186E         | rs74419361 | 0.0023 |
|         | ex44     | c. 8868C>A                                        | p. Y2956*         |            | 0      |
| 11      | ex32     | c. 6563T>C                                        | p. I2188T         |            | 0      |
|         | ex44     | c. 8868C>A                                        | p. Y2956*         |            | 0      |
| 12      | ex26     | c. 4957_4958insA                                  | p. S1653Kfs*2     |            | 0      |
|         | ex44     | c. 8351T>G                                        | P. L2784R         |            | 0      |
| 13      | ex26     | c. 5202_5203delGT                                 | p. F1735Qfs*6     |            | 0      |
|         | ex44     | c. 8439_8442dupTGCA                               | p. E2815Cfs*19    |            | 0      |
| 14      | ex26     | c. 5202_5203delGT                                 | p. F1735Qfs*6     |            | 0      |
|         | ex44     | c. 8439_8442dupTGCA                               | p. E2815Cfs*19    |            | 0      |
| 15      | ex26     | c. 4957_4958insA                                  | p. S1653Kfs*2     |            | 0      |
|         | ex32     | c. 6563T>C                                        | p. I2188T         |            | 0      |
| 16      | ex26     | c. 4957_4958insA                                  | p. S1653Kfs*2     |            | 0      |
|         | ex32     | c. 6563T>C                                        | p. I2188T         |            | 0      |
| 17      | ex26     | c. 4957_4958insA                                  | p. S1653Kfs*2     |            | 0      |
|         | ex44     | c. 8868C>A                                        | p. Y2956*         |            | 0      |
| 18      | ex4      | c. 228G>C                                         | p. Q76H           |            | 0      |
|         | ex16     | c. 2522_2523insA                                  | p. Y841fs*        |            | 0      |
| 19      | ex26     | c. 4957_4958insA                                  | p. S1653Kfs*2     |            | 0      |
|         | ex44     | c. 8868C>A                                        | p. Y2956*         |            | 0      |
| 20      | ex26     | c. 4957_4958insA                                  | p. S1653Kfs*2     |            | 0      |
|         | ex44     | c. 8868C>A                                        | p. Y2956*         |            | 0      |
| 21      | ex26     | c. 4957_4958insA                                  | p. S1653Kfs*2     |            | 0      |
|         | ex41     | c. 8048C>T                                        | p. T2683I         |            | 0      |
| 22      | ex26     | c. 4957_4958insA                                  | p. S1653Kfs*2     |            | 0      |
|         | ex44     | c. 8868C>A                                        | p. Y2956*         |            | 0      |
| 23      | IVS27    | c. IVS27-2A>G                                     | p. -              |            | 0      |
|         | ex44     | c. 8299G>C                                        | p. D2767H         |            | 0      |
| 24      | ex10     | c. 2101C>T                                        | p. P701S          |            | 0      |
|         | ex26     | c.4557delA                                        | p. A1520Pfs*30    |            | 0      |
| 25      | IVS27    | c. IVS27-3_4insT                                  | p. -              |            | 0      |
|         | ex4      | c. 35T>C                                          | p. M12T           |            | 0      |
| 26      | ex35     | c.6869_6896delccatattcctgcaaatgttcaaattcataagaaag | 2290Qfs*12        |            | 0      |
|         | ex26     | c. 4957_4958insA                                  | p. S1653Kfs*2     |            | 0      |
| 27      | ex32     | c. 6563T>C                                        | p. I2188T         |            | 0      |
|         | ex35     | c. 6897_6902 dupAGGTCC                            | p. G2300_P2301dup |            | 0      |

|    |      |                  |               |            |        |
|----|------|------------------|---------------|------------|--------|
| 28 | ex32 | c. 6557G>A       | p. G2186E     | rs74419361 | 0.0023 |
|    | ex35 | c. 6976C>T       | p. R2326Q     | rs4710457  | 0.3496 |
| 29 | ex4  | c. 141A>T        | p. E47D       |            | 0      |
|    | ex26 | c. 4957_4958insA | p. S1653Kfs*2 |            | 0      |
| 30 | ex26 | c. 4957_4958insA | p. S1653Kfs*2 |            | 0      |
|    | ex32 | c. 6557G>A       | p. G2186E     | rs74419361 | 0.0023 |
| 31 | ex26 | c. 4957_4958insA | p. S1653Kfs*2 |            | 0      |
|    | ex44 | c. 8351T>G       | P. L2784R     |            | 0      |

---

Thirty one patients were found to carry compound heterozygous *EYS* mutations.

There were no patients who carry a homozygous *EYS* mutation.

\* indicates truncating and nonsense variants.
